# Supplementary material for: Detailed Characterization of the Lung–Gut Microbiome Axis Reveals the Link between PD-L1 and the Microbiome in Non-Small-Cell Lung Cancer Patients
Source: MDPI journal article supplement (doi:10.3390/ijms25042323), 2024-02-15
Supplement: s1 [file s1]

**Supplementary Table S1.** A permutational multivariate analysis of variance in microbiome composition between samples.

**Supplementary Table S2.** Differential analysis of bacterial abundance in lung tumor and lung parenchyma tissue.

**Supplementary Table S3.** Differential analysis of the stool microbiomes between the NSCLC patients and control group.

**Supplementary Table S4.**  $\beta$ -diversity analysis along the lung–gut axis.

**Supplementary Table S5.**  $\beta$ -diversity analysis between NSCLC patients' samples and smoking habits.

**Supplementary Table S6.**  $\beta$ -diversity analysis between NSCLC patients' samples and COPD.

**Supplementary Table S7.**  $\beta$ -diversity analysis between NSCLC patients' samples and histological type of lung cancer.

**Supplementary Table S8.**  $\beta$ -diversity analysis between NSCLC patients' samples and degree of histologic differentiation in cancer cells.

**Supplementary Table S9.**  $\beta$ -diversity analysis between NSCLC patients' samples and PD-L1 expression on non-small cell lung cancer tissue.

**Supplementary Table S10.**  $\beta$ -diversity analysis between NSCLC patients' samples and CD8<sup>+</sup> T cells in non-small cell lung cancer tissue.

**Supplementary Table S11.**  $\beta$ -diversity analysis between NSCLC patients' samples and lipopolysaccharide level.

**Supplementary Table S12.**  $\beta$ -diversity analysis between NSCLC patients' samples and stage of lung cancer.

**Supplementary Figure S1.** (A–D) Venn diagram of unique bacterial sequences of all detected ASV.

**Supplementary Figure S2.** (A–D) Venn diagram of unique bacterial sequences of bacterial composition at the genus level.
