# Supplementary material for: Detailed Characterization of the Lung–Gut Microbiome Axis Reveals the Link between PD-L1 and the Microbiome in Non-Small-Cell Lung Cancer Patients
Source: Int J Mol Sci. 2024 Feb 15;25(4):2323. doi: 10.3390/ijms25042323 (PMC10889071; doi:10.3390/ijms25042323)
Supplement: Supplementary file 1 [file ijms-25-02323-s001.zip]

Archive with 15 entries (15 files):
- Supplementary Figure S1. Venn Stool vs biopsy ASV 1.tiff
- Supplementary Figure S2. Venn Stool vs biopsy GENUS 1.tiff
- Supplementary Table S1.xlsx
- Supplementary Table S10.xlsx
- Supplementary Table S11.xlsx
- Supplementary Table S12.xlsx
- Supplementary Table S2.xlsx
- Supplementary Table S3.xlsx
- Supplementary Table S4.xlsx
- Supplementary Table S5.xlsx
- Supplementary Table S6.xlsx
- Supplementary Table S7.xlsx
- Supplementary Table S8.xlsx
- Supplementary Table S9.xlsx
- Supplementary Tables and Figure Captions.pdf
