# Supplementary material for: Detailed Characterization of the Lung–Gut Microbiome Axis Reveals the Link between PD-L1 and the Microbiome in Non-Small-Cell Lung Cancer Patients
Source: Int J Mol Sci. 2024 Feb 15;25(4):2323. doi: 10.3390/ijms25042323 (PMC10889071; doi:10.3390/ijms25042323)
Supplement: Supplementary file 1 [file ijms-25-02323-s001.zip › Supplementary Table S1.xlsx]

## Sheet: Sheet1
Group		Phylum		Class		Order		Family		Genus		ASV
		P-value	F	P-value	F	P-value	F	P-value	F	P-value	F	P-value	F
Biopsy all samples	NSCLC tumor vs NSCLC parenchyma	0.001	31.6	0.001	24.321	0.001	17.323	0.001	15.264	0.001	13.247	0.001	8.18
Biopsy paired samples	NSCLC tumor vs NSCLC parenchyma	0.001	14.9	0.001	13.445	0.001	8.7267	0.001	7.946	0.002	6.9826	0.001	4.3
Stool samples	NSCLC vs Control	0.018	5.3	0.043	2.7862	0.035	2.5763	ns	-	0.04	1.8066	1.3872	0.01
