# Supplementary material for: Detailed Characterization of the Lung–Gut Microbiome Axis Reveals the Link between PD-L1 and the Microbiome in Non-Small-Cell Lung Cancer Patients
Source: Int J Mol Sci. 2024 Feb 15;25(4):2323. doi: 10.3390/ijms25042323 (PMC10889071; doi:10.3390/ijms25042323)
Supplement: Supplementary file 1 [file ijms-25-02323-s001.zip › Supplementary Table S2.xlsx]

## Sheet: tumor_vs_parenchyma
number	baseMean	log2FoldChange	lfcSE	stat	pvalue	padj	Phylum	Class	Order	Family	Genus	Significant taxa	Level	Mean in parenchyma group	Mean in cancer group	Count in parenchyma group	Count in cancer group
1	8810.05	-2.05238	0.246349	-8.33118	8.00414e-17	8.00414e-16	Proteobacteria					Phylum_Proteobacteria	Phylum	66.3289	39.543	54	74
2	1811.45	0.382197	0.15068	2.53649	0.0111971	0.0373236	Firmicutes					Phylum_Firmicutes	Phylum	17.7005	30.1522	54	74
3	706.122	0.543556	0.170517	3.1877	0.00143411	0.00717055	Bacteroidota					Phylum_Bacteroidota	Phylum	6.45335	13.0578	54	74
4	8633.08	-2.15059	0.251471	-8.55203	1.20942e-17	1.93508e-16	Proteobacteria	Gammaproteobacteria				Class_Gammaproteobacteria	Class	63.8848	36.9019	54	74
5	731.073	0.647901	0.18193	3.56126	0.000369074	0.0019684	Bacteroidota	Bacteroidia				Class_Bacteroidia	Class	6.45354	13.0587	54	74
6	276.335	0.925332	0.231405	3.99876	6.3675e-05	0.0005094	Firmicutes	Clostridia				Class_Clostridia	Class	2.17928	6.421	54	74
7	5117.08	-1.75897	0.179591	-9.79432	1.19093e-22	4.04917e-21	Proteobacteria	Gammaproteobacteria	Pseudomonadales			Order_Pseudomonadales	Order	59.8246	30.7371	54	74
8	454.461	0.995444	0.428667	2.32218	0.020223	0.0429738	Actinobacteriota	Actinobacteria	Actinomycetales			Order_Actinomycetales	Order	2.57325	3.19469	52	68
9	1890.97	1.17006	0.30964	3.77876	0.000157609	0.000662983	Firmicutes	Bacilli	Lactobacillales			Order_Lactobacillales	Order	10.8366	14.5364	54	74
10	118.606	1.26373	0.432392	2.92264	0.00347074	0.00842895	Actinobacteriota	Coriobacteriia	Coriobacteriales			Order_Coriobacteriales	Order	0.512289	0.778975	48	66
11	134.435	1.35632	0.381913	3.55138	0.000383219	0.00130294	Firmicutes	Bacilli	Staphylococcales			Order_Staphylococcales	Order	1.05406	2.41791	51	70
12	768.272	1.44691	0.377241	3.8355	0.000125309	0.000662983	Firmicutes	Negativicutes	Veillonellales-Selenomonadales			Order_Veillonellales.Selenomonadales	Order	3.20753	5.65421	53	70
13	1531.03	1.51059	0.321278	4.70183	2.57836e-06	2.19161e-05	Bacteroidota	Bacteroidia	Bacteroidales			Order_Bacteroidales	Order	6.15909	12.4598	54	74
14	67.5904	1.52401	0.451825	3.37302	0.000743495	0.00210657	Firmicutes	Bacilli	Erysipelotrichales			Order_Erysipelotrichales	Order	0.309569	0.781857	48	69
15	211.503	1.5283	0.554938	2.75401	0.00588708	0.0133441	Proteobacteria	Gammaproteobacteria	Burkholderiales			Order_Burkholderiales	Order	1.16249	1.80682	50	64
16	204.417	1.56323	0.215247	7.26249	3.80041e-13	6.46071e-12	Actinobacteriota	Actinobacteria	Propionibacteriales			Order_Propionibacteriales	Order	1.11635	3.90089	54	74
17	361.894	1.57755	0.360993	4.37004	1.24222e-05	8.44707e-05	Firmicutes	Clostridia	Lachnospirales			Order_Lachnospirales	Order	1.51281	4.38861	54	74
18	604.753	1.67507	0.441808	3.7914	0.0001498	0.000662983	Fusobacteriota	Fusobacteriia	Fusobacteriales			Order_Fusobacteriales	Order	2.27086	5.10883	52	66
19	74.7014	1.7517	0.511369	3.42551	0.000613648	0.00189673	Campylobacterota	Campylobacteria	Campylobacterales			Order_Campylobacterales	Order	0.284984	0.564489	44	58
20	19.8833	1.82797	0.487211	3.75191	0.000175496	0.000662983	Firmicutes	Clostridia	Oscillospirales			Order_Oscillospirales	Order	0.146035	0.953648	42	67
21	35.007	2.03113	0.417763	4.86193	1.16248e-06	1.31748e-05	Actinobacteriota	Actinobacteria	Corynebacteriales			Order_Corynebacteriales	Order	0.233559	0.871198	47	65
22	18.1781	2.2654	0.73968	3.06267	0.00219368	0.00573732	Firmicutes	Clostridia	Clostridia UCG-014			Order_Clostridia.UCG.014	Order	0.0496367	0.179517	29	44
23	4110.71	-1.49758	0.130294	-11.4938	1.41672e-30	8.21697e-29	Proteobacteria	Gammaproteobacteria	Pseudomonadales	Pseudomonadaceae		Family_Pseudomonadaceae	Family	59.8529	30.7349	54	74
24	1922.78	0.982878	0.39237	2.50498	0.012246	0.0382571	Bacteroidota	Bacteroidia	Bacteroidales	Prevotellaceae		Family_Prevotellaceae	Family	5.32911	10.8827	54	74
25	156.619	1.14377	0.150032	7.6235	2.46881e-14	7.15955e-13	Actinobacteriota	Actinobacteria	Propionibacteriales	Propionibacteriaceae		Family_Propionibacteriaceae	Family	1.1184	3.91563	54	74
26	526.141	1.43024	0.415994	3.43814	0.000585731	0.00413676	Firmicutes	Clostridia	Lachnospirales	Lachnospiraceae		Family_Lachnospiraceae	Family	1.51622	4.43451	54	74
27	25.8685	1.43537	0.386625	3.71257	0.000205163	0.00169992	Actinobacteriota	Actinobacteria	Corynebacteriales	Corynebacteriaceae		Family_Corynebacteriaceae	Family	0.22844	0.860709	45	65
28	401.039	1.4389	0.550526	2.61369	0.00895701	0.0324692	Fusobacteriota	Fusobacteriia	Fusobacteriales	Leptotrichiaceae		Family_Leptotrichiaceae	Family	1.19655	2.84777	46	61
29	35.4214	1.64525	0.658947	2.49678	0.0125325	0.0382571	Firmicutes	Clostridia	Peptostreptococcales-Tissierellales	Anaerovoracaceae		Family_Anaerovoracaceae	Family	0.142433	0.22589	41	41
30	13.3132	1.7135	0.515029	3.32699	0.000877893	0.00509178	Firmicutes	Clostridia	Oscillospirales	Ruminococcaceae		Family_Ruminococcaceae	Family	0.110655	0.639973	40	60
31	93.616	2.16421	0.693645	3.12006	0.00180815	0.00873939	Firmicutes	Negativicutes	Veillonellales-Selenomonadales	Selenomonadaceae		Family_Selenomonadaceae	Family	0.21836	0.646173	38	50
32	9.58734	2.71053	0.695651	3.8964	9.76331e-05	0.000943786	Actinobacteriota	Coriobacteriia	Coriobacteriales	Coriobacteriaceae		Family_Coriobacteriaceae	Family	0.0265994	0.19994	12	43
33	7.3689	3.12677	0.916067	3.41326	0.000641911	0.00413676	Bacteroidota	Bacteroidia	Bacteroidales	Bacteroidaceae		Family_Bacteroidaceae	Family	0.0350028	0.266074	21	44
34	5.84934	3.38502	1.08117	3.13088	0.00174281	0.00873939	Firmicutes	Bacilli	Lactobacillales	Lactobacillaceae		Family_Lactobacillaceae	Family	0.202226	0.357724	20	31
35	13.7156	3.45673	0.735282	4.70123	2.58599e-06	3.74969e-05	Proteobacteria	Gammaproteobacteria	Enterobacterales	Enterobacteriaceae		Family_Enterobacteriaceae	Family	0.0393431	0.324175	18	48
36	13.0671	3.69597	0.865804	4.26883	1.96502e-05	0.000227942	Firmicutes	Bacilli	Erysipelotrichales	Erysipelatoclostridiaceae		Family_Erysipelatoclostridiaceae	Family	0.0382174	0.212288	23	45
37	2.73032	3.85569	1.39542	2.76311	0.00572527	0.0221377	Firmicutes	Clostridia	Peptostreptococcales-Tissierellales	Peptostreptococcaceae		Family_Peptostreptococcaceae	Family	0.0188638	0.102687	14	29
38	1.51051	3.93935	1.32412	2.97507	0.00292918	0.0130686	Bacteroidota	Bacteroidia	Bacteroidales	Rikenellaceae		Family_Rikenellaceae	Family	0.0101897	0.110792	8	37
39	1.85802	4.16646	1.66152	2.50761	0.012155	0.0382571	Proteobacteria	Gammaproteobacteria	Burkholderiales	Oxalobacteraceae		Family_Oxalobacteraceae	Family	0.00399583	0.100391	6	22
40	2.08648	4.56298	1.58194	2.88441	0.00392144	0.0162459	Firmicutes	Clostridia	Oscillospirales	Oscillospiraceae		Family_Oscillospiraceae	Family	0.0141667	0.199514	12	47
41	6.68242	5.51563	1.02149	5.39958	6.67954e-08	1.29138e-06	Bacteroidota	Bacteroidia	Bacteroidales	Muribaculaceae		Family_Muribaculaceae	Family	0.00448325	0.19399	4	37
42	4125.4	-1.50109	0.131855	-11.3844	5.00103e-30	3.50072e-28	Proteobacteria	Gammaproteobacteria	Pseudomonadales	Pseudomonadaceae	Pseudomonas	Genus_Pseudomonas	Genus	60.4955	31.5847	54	74
45	1039.92	1.50295	0.441892	3.40118	0.000670962	0.00469673	Bacteroidota	Bacteroidia	Bacteroidales	Prevotellaceae	Prevotella_7	Genus_Prevotella_7	Genus	3.36514	6.05938	54	68
44	396.47	1.43236	0.557958	2.56715	0.0102537	0.0478507	Fusobacteriota	Fusobacteriia	Fusobacteriales	Leptotrichiaceae	Leptotrichia	Genus_Leptotrichia	Genus	1.19017	2.93215	46	60
48	201.605	2.3141	0.610463	3.79072	0.000150208	0.00158929	Bacteroidota	Bacteroidia	Bacteroidales	Prevotellaceae	Alloprevotella	Genus_Alloprevotella	Genus	0.473099	1.29494	45	59
43	155.375	1.14492	0.15127	7.56873	3.76879e-14	1.31908e-12	Actinobacteriota	Actinobacteria	Propionibacteriales	Propionibacteriaceae	Cutibacterium	Genus_Cutibacterium	Genus	1.12431	3.98262	54	74
46	21.6733	1.6268	0.449282	3.62088	0.000293601	0.00256901	Actinobacteriota	Actinobacteria	Corynebacteriales	Corynebacteriaceae	Corynebacterium	Genus_Corynebacterium	Genus	0.188188	0.785867	44	61
50	17.3633	2.99591	0.754521	3.97062	7.16867e-05	0.00125452	Firmicutes	Clostridia	Lachnospirales	Lachnospiraceae	Agathobacter	Genus_Agathobacter	Genus	0.027655	0.325117	17	39
54	12.8817	3.6361	0.962364	3.77829	0.000157906	0.00158929	Firmicutes	Bacilli	Erysipelotrichales	Erysipelatoclostridiaceae	Catenibacterium	Genus_Catenibacterium	Genus	0.0308845	0.196827	20	35
53	12.737	3.50145	0.742878	4.71336	2.43661e-06	5.68543e-05	Bacteroidota	Bacteroidia	Bacteroidales	Prevotellaceae	Prevotella_9	Genus_Prevotella_9	Genus	0.0265086	0.524474	7	54
49	9.61129	2.64138	0.69939	3.77669	0.000158929	0.00158929	Actinobacteriota	Coriobacteriia	Coriobacteriales	Coriobacteriaceae	Collinsella	Genus_Collinsella	Genus	0.0272486	0.211452	12	43
52	7.34545	3.13033	0.917687	3.41111	0.00064698	0.00469673	Bacteroidota	Bacteroidia	Bacteroidales	Bacteroidaceae	Bacteroides	Genus_Bacteroides	Genus	0.0355789	0.278894	21	44
47	5.69492	2.0923	0.804604	2.60041	0.00931131	0.0465565	Firmicutes	Clostridia	Oscillospirales	Ruminococcaceae	Faecalibacterium	Genus_Faecalibacterium	Genus	0.0407097	0.293801	25	49
55	4.84864	3.78942	1.1276	3.36061	0.000777702	0.00494901	Proteobacteria	Gammaproteobacteria	Enterobacterales	Enterobacteriaceae	Escherichia-Shigella	Genus_Escherichia.Shigella	Genus	0.014874	0.125324	8	25
51	3.79736	3.12423	1.12055	2.78812	0.00530144	0.0285462	Firmicutes	Clostridia	Oscillospirales	Ruminococcaceae	Subdoligranulum	Genus_Subdoligranulum	Genus	0.00880023	0.104131	10	31
56	2.10504	4.573	1.57153	2.90991	0.00361538	0.0210897	Firmicutes	Clostridia	Oscillospirales	Oscillospiraceae	UCG-002	Genus_UCG.002	Genus	0.00405627	0.104844	6	36
