# Supplementary material for: Detailed Characterization of the Lung–Gut Microbiome Axis Reveals the Link between PD-L1 and the Microbiome in Non-Small-Cell Lung Cancer Patients
Source: Int J Mol Sci. 2024 Feb 15;25(4):2323. doi: 10.3390/ijms25042323 (PMC10889071; doi:10.3390/ijms25042323)
Supplement: Supplementary file 1 [file ijms-25-02323-s001.zip › Supplementary Table S3.xlsx]

## Sheet: NSCLC_vs_control group
Number	baseMean	log2FoldChange	lfcSE	stat	pvalue	padj	Phylum	Class	Order	Family	Genus	Significant taxa	Level	Mean in T group	Mean in control group	Count in T group	Count in control group
1	226.136	1.45836	0.551793	2.64295	0.00821863	0.0497777	Desulfobacterota					Phylum_Desulfobacterota	Phylum	0.612006	0.25583	46	38
2	9354.22	0.761768	0.299821	2.54074	0.0110617	0.0497777	Bacteroidota					Phylum_Bacteroidota	Phylum	21.7218	15.4888	55	50
3	58.5541	1.81757	0.635434	2.86035	0.00423172	0.0441308	Firmicutes	Clostridia	Lachnospirales	Lachnospiraceae	[Eubacterium] ventriosum group	Genus_.Eubacterium..ventriosum.group	Genus	0.410758	0.177129	37	32
4	3.74032	-5.44333	1.62411	-3.35158	0.00080352	0.0146642	Firmicutes	Clostridia	Lachnospirales	Lachnospiraceae	Acetitomaculum	Genus_Acetitomaculum	Genus	0.00311259	0.0167916	6	12
5	829.246	1.47128	0.40477	3.63485	0.000278147	0.00676825	Bacteroidota	Bacteroidia	Bacteroidales	Rikenellaceae	Alistipes	Genus_Alistipes	Genus	1.66015	1.52119	55	49
6	3419.15	1.30059	0.306278	4.24645	2.17186e-05	0.000792729	Bacteroidota	Bacteroidia	Bacteroidales	Bacteroidaceae	Bacteroides	Genus_Bacteroides	Genus	9.89217	7.93755	55	50
7	1785.21	-1.46183	0.279646	-5.22741	1.71897e-07	2.01505e-05	Firmicutes	Clostridia	Lachnospirales	Lachnospiraceae	Blautia	Genus_Blautia	Genus	3.67401	5.07326	55	50
8	32.9734	10.5769	2.89398	3.65481	0.000257375	0.00676825	Bacteroidota	Bacteroidia	Bacteroidales	Muribaculaceae	CAG-873	Genus_CAG.873	Genus	0.535998	0.0605136	6	4
9	660.848	-1.5025	0.431239	-3.48414	0.00049373	0.0102978	Firmicutes	Clostridia	Clostridiales	Clostridiaceae	Clostridium sensu stricto 1	Genus_Clostridium.sensu.stricto.1	Genus	1.29916	1.94852	51	47
10	250.99	-1.18617	0.363695	-3.26144	0.00110847	0.0179819	Firmicutes	Clostridia	Lachnospirales	Lachnospiraceae	Fusicatenibacter	Genus_Fusicatenibacter	Genus	0.64111	0.732658	52	46
11	131.71	-0.994006	0.345963	-2.87315	0.00406395	0.0441308	Firmicutes	Clostridia	Oscillospirales	Ruminococcaceae	Incertae Sedis	Genus_Incertae.Sedis	Genus	0.261941	0.345216	55	50
12	10.4502	3.33608	1.05403	3.16508	0.00155041	0.0213984	Firmicutes	Clostridia	Oscillospirales	Oscillospiraceae	Intestinimonas	Genus_Intestinimonas	Genus	0.0457334	0.00919445	25	11
13	318.157	-3.19686	0.631493	-5.06238	4.14051e-07	2.01505e-05	Firmicutes	Bacilli	Lactobacillales	Streptococcaceae	Lactococcus	Genus_Lactococcus	Genus	0.170203	1.02275	44	40
14	27.9515	4.60808	1.47307	3.12821	0.00175877	0.0213984	Actinobacteriota	Coriobacteriia	Coriobacteriales	Atopobiaceae	Libanicoccus	Genus_Libanicoccus	Genus	0.172986	0.0413736	22	6
15	22.2772	2.30926	0.735193	3.14102	0.00168358	0.0213984	Firmicutes	Clostridia	Oscillospirales	Oscillospiraceae	Oscillibacter	Genus_Oscillibacter	Genus	0.126427	0.0408374	39	20
16	1031.34	-2.31463	0.455308	-5.08366	3.70237e-07	2.01505e-05	Firmicutes	Clostridia	Peptostreptococcales-Tissierellales	Peptostreptococcaceae	Romboutsia	Genus_Romboutsia	Genus	1.45981	2.89884	50	46
17	49.9169	4.57593	1.63431	2.79992	0.00511156	0.0497525	Proteobacteria	Gammaproteobacteria	Enterobacterales	Enterobacteriaceae	Citrobacter	Genus_Citrobacter	Genus	0.35842	0.155794	14	9
