# Supplementary material for: Detailed Characterization of the Lung–Gut Microbiome Axis Reveals the Link between PD-L1 and the Microbiome in Non-Small-Cell Lung Cancer Patients
Source: Int J Mol Sci. 2024 Feb 15;25(4):2323. doi: 10.3390/ijms25042323 (PMC10889071; doi:10.3390/ijms25042323)
Supplement: Supplementary file 1 [file ijms-25-02323-s001.zip › Supplementary Table S4.xlsx]

## Sheet: Tumor_Biopsy_vs_Stool_NSCLC
Number	Bacteria	Correlation	PValue	count_biopsy_tumor	count_stool_tumor	mean_biopsy_tumor	mean_stool_tumor
1	g__Romboutsia	0.32411	0.0387048	5	37	0.156317	1.54542
2	g__Alistipes	0.476683	0.00162807	9	41	0.25441	1.29193
