# Supplementary material for: Detailed Characterization of the Lung–Gut Microbiome Axis Reveals the Link between PD-L1 and the Microbiome in Non-Small-Cell Lung Cancer Patients
Source: Int J Mol Sci. 2024 Feb 15;25(4):2323. doi: 10.3390/ijms25042323 (PMC10889071; doi:10.3390/ijms25042323)
Supplement: Supplementary file 1 [file ijms-25-02323-s001.zip › Supplementary Table S5.xlsx]

## Sheet: Smoking_NSCLC
Number	baseMean	log2FoldChange	lfcSE	stat	pvalue	padj	Phylum	Class	Order	Family	Genus	Species	Tax level	Variable	Group	Comp	Mean in smoking group	Mean in nonsmoking group	Count in smoking group	Count in nonsmoking group
1	773.801	-0.95655	0.282787	-3.38259	0.00071807	0.0071807	Actinobacteriota						Phylum	Phylum Actinobacteriota	biopsy cancer	smoking vs nonsmoking	9.22776	14.2448	37	18
2	47.3712	27.155	2.10946	12.8729	6.39146e-38	6.71104e-36	Bacteroidota	Bacteroidia	Bacteroidales	Prevotellaceae	Alloprevotella	Alloprevotella tannerae	Species	Species Alloprevotella tannerae	biopsy cancer	smoking vs nonsmoking	1.15144	0.0657874	16	3
3	555.17	4.20459	1.18257	3.55548	0.000377291	0.0198078	Firmicutes	Bacilli	Lactobacillales	Streptococcaceae	Streptococcus	Streptococcus salivarius	Species	Species Streptococcus salivarius	biopsy cancer	smoking vs nonsmoking	8.14953	1.80348	23	9
4	19.1052	-5.32789	1.82516	-2.91913	0.00351011	0.0210606	Proteobacteria	Alphaproteobacteria					Class	Class Alphaproteobacteria	stool cancer	smoking vs nonsmoking	0.0230304	0.146354	8	10
5	9359.79	-1.26059	0.502252	-2.50988	0.0120773	0.0483092	Bacteroidota	Bacteroidia					Class	Class Bacteroidia	stool cancer	smoking vs nonsmoking	16.2793	31.9719	27	14
6	3099.33	1.4563	0.383211	3.80026	0.000144544	0.00173453	Actinobacteriota	Coriobacteriia					Class	Class Coriobacteriia	stool cancer	smoking vs nonsmoking	8.80145	3.66397	27	14
7	2412.45	1.82057	0.593615	3.06692	0.00216276	0.0464994	Firmicutes	Bacilli	Erysipelotrichales	Erysipelotrichaceae			Family	Family Erysipelotrichaceae	stool cancer	smoking vs nonsmoking	7.02426	1.74253	27	14
8	18.5889	22.6691	3.0913	7.33319	2.24745e-13	9.66405e-12	Proteobacteria	Gammaproteobacteria	Enterobacterales	Succinivibrionaceae			Family	Family Succinivibrionaceae	stool cancer	smoking vs nonsmoking	0.810651	0.336656	6	3
9	6.61136	22.0989	3.09263	7.14565	8.95721e-13	5.7774e-11	Firmicutes	Clostridia	Lachnospirales	Lachnospiraceae	[Ruminococcus] gnavus group		Genus	Genus [Ruminococcus] gnavus group	stool cancer	smoking vs nonsmoking	0.188852	0.00947286	6	1
10	967.266	2.84315	0.801549	3.54707	0.000389535	0.01675	Firmicutes	Clostridia	Lachnospirales	Lachnospiraceae	[Ruminococcus] torques group		Genus	Genus [Ruminococcus] torques group	stool cancer	smoking vs nonsmoking	2.07642	0.491072	27	13
11	63.4773	5.50288	1.63634	3.36292	0.000771239	0.0248725	Firmicutes	Bacilli	Lactobacillales	Enterococcaceae	Enterococcus		Genus	Genus Enterococcus	stool cancer	smoking vs nonsmoking	0.228637	0.884376	14	5
12	2124.28	3.47289	1.10453	3.14423	0.00166525	0.0319366	Firmicutes	Bacilli	Erysipelotrichales	Erysipelotrichaceae	Holdemanella		Genus	Genus Holdemanella	stool cancer	smoking vs nonsmoking	4.66605	1.18682	21	9
13	134.475	1.99928	0.646361	3.09313	0.00198056	0.0319366	Firmicutes	Clostridia	Oscillospirales	Ruminococcaceae	Incertae Sedis		Genus	Genus Incertae Sedis	stool cancer	smoking vs nonsmoking	0.337588	0.141909	27	14
14	19.5073	7.21741	2.23298	3.23219	0.00122847	0.0316945	Firmicutes	Clostridia	Lachnospirales	Lachnospiraceae	Sellimonas		Genus	Genus Sellimonas	stool cancer	smoking vs nonsmoking	0.331936	0.0605434	10	3
15	421.679	5.96867	1.92602	3.09897	0.00194194	0.0319366	Firmicutes	Bacilli	Erysipelotrichales	Erysipelotrichaceae	Solobacterium		Genus	Genus Solobacterium	stool cancer	smoking vs nonsmoking	1.30914	0.0659047	18	6
16	20.5284	23.1402	3.0914	7.48534	7.13626e-14	9.20578e-12	Proteobacteria	Gammaproteobacteria	Enterobacterales	Succinivibrionaceae	Succinivibrio		Genus	Genus Succinivibrio	stool cancer	smoking vs nonsmoking	0.886896	0.369741	5	1
17	2787.39	1.19455	0.343336	3.47923	0.000502852	0.0130742	Actinobacteriota	Coriobacteriia	Coriobacteriales				Order	Order Coriobacteriales	stool cancer	smoking vs nonsmoking	8.86135	3.72395	27	14
18	3492.46	1.21035	0.437097	2.76906	0.00562177	0.0393524	Actinobacteriota						Phylum	Phylum Actinobacteriota	stool cancer	smoking vs nonsmoking	9.01811	3.75787	27	14
19	38.622	9.83054	1.98316	4.95701	7.15852e-07	6.94377e-05	Firmicutes	Bacilli	Lactobacillales	Enterococcaceae	Enterococcus	Enterococcus faecium	Species	Species Enterococcus faecium	stool cancer	smoking vs nonsmoking	0.634432	0.0114401	10	1
