# Supplementary material for: Detailed Characterization of the Lung–Gut Microbiome Axis Reveals the Link between PD-L1 and the Microbiome in Non-Small-Cell Lung Cancer Patients
Source: Int J Mol Sci. 2024 Feb 15;25(4):2323. doi: 10.3390/ijms25042323 (PMC10889071; doi:10.3390/ijms25042323)
Supplement: Supplementary file 1 [file ijms-25-02323-s001.zip › Supplementary Table S6.xlsx]

## Sheet: COPD_NSCLC
Number	Row.names	baseMean	log2FoldChange	lfcSE	stat	pvalue	padj	Tax	Comp	Group	count_COPD_yes	count_COPD_no	mean_COPD_yes	mean_COPD_no
1	ASV_215	16.0655	5.95664	1.75819	3.38794	0.000704186	0.038026	ASV	COPD_no vs COPD_yes	biopsy tumor	2	13	0.0208234	0.126927
2	Family_Peptococcaceae	7.57817	5.69341	1.72296	3.30445	0.000951646	0.0475823	Family	COPD_no vs COPD_yes	biopsy tumor	1	13	0.0279857	0.0927034
3	Genus_[Eubacterium] hallii group	7.9233	-2.93086	0.976558	-3.00121	0.00268905	0.0457139	Genus	COPD_no vs COPD_yes	biopsy tumor	13	16	0.231712	0.0388814
4	Genus_Fusobacterium	697.365	2.5308	0.810543	3.12235	0.00179413	0.0457139	Genus	COPD_no vs COPD_yes	biopsy tumor	18	41	1.36358	2.9076
5	Genus_Oribacterium	163.925	2.40352	0.791778	3.0356	0.0024006	0.0457139	Genus	COPD_no vs COPD_yes	biopsy tumor	17	37	0.335892	0.692332
6	Genus_Peptococcus	14.1801	23.7145	1.97489	12.008	3.22556e-33	2.19338e-31	Genus	COPD_no vs COPD_yes	biopsy tumor	1	13	0.0284719	0.0976277
7	Order_Peptococcales	4.57486	5.13032	1.56371	3.28086	0.0010349	0.0300121	Order	COPD_no vs COPD_yes	biopsy tumor	1	13	0.0278149	0.090573
8	Phylum_Patescibacteria	14.4655	4.62217	1.4659	3.15312	0.00161536	0.0129229	Phylum	COPD_no vs COPD_yes	biopsy tumor	3	17	0.127756	0.309675
9	Species_Fusobacterium nucleatum	86.3824	3.85494	1.06288	3.62687	0.000286873	0.00717181	Species	COPD_no vs COPD_yes	biopsy tumor	6	31	0.318526	1.53205
10	Species_Selenomonas sputigena	21.3123	7.0151	1.61597	4.34111	1.41765e-05	0.000708824	Species	COPD_no vs COPD_yes	biopsy tumor	1	16	0.0201939	0.180191
11	ASV_120	60.6465	7.6089	1.70393	4.4655	7.98805e-06	0.000452323	ASV	COPD_no vs COPD_yes	stool NSCLC	1	17	0.00960501	0.242556
12	ASV_131	105.039	9.33434	1.9492	4.78881	1.67772e-06	0.000126668	ASV	COPD_no vs COPD_yes	stool NSCLC	1	14	0.0203331	0.223348
13	ASV_143	19.7403	22.7043	2.34783	9.67035	4.03006e-22	6.08538e-20	ASV	COPD_no vs COPD_yes	stool NSCLC	0	11	0	0.114584
14	ASV_1650	10.3399	6.24329	1.82363	3.42354	0.000618108	0.0241097	ASV	COPD_no vs COPD_yes	stool NSCLC	1	13	0.00444951	0.0292609
15	ASV_25	486.646	4.42741	1.17458	3.76935	0.000163671	0.00823813	ASV	COPD_no vs COPD_yes	stool NSCLC	7	28	0.0612381	1.0797
16	ASV_28	279.492	6.2456	1.6975	3.67929	0.000233882	0.0105948	ASV	COPD_no vs COPD_yes	stool NSCLC	5	16	0.0911196	0.518705
17	ASV_336	23.523	22.9487	2.04679	11.212	3.5587e-29	1.61209e-26	ASV	COPD_no vs COPD_yes	stool NSCLC	1	13	0.00557093	0.0925768
18	ASV_340	58.366	5.52592	1.65671	3.33547	0.000851548	0.0296732	ASV	COPD_no vs COPD_yes	stool NSCLC	3	16	0.0280314	0.150754
19	ASV_421	10.9626	-25.4447	2.9315	-8.67976	3.96619e-18	3.59336e-16	ASV	COPD_no vs COPD_yes	stool NSCLC	4	2	0.29137	0.0118249
20	ASV_462	31.0787	23.3441	2.15493	10.8329	2.40515e-27	5.44765e-25	ASV	COPD_no vs COPD_yes	stool NSCLC	0	11	0	0.0760603
21	ASV_69	14.9126	5.25932	1.54023	3.41464	0.000638668	0.0241097	ASV	COPD_no vs COPD_yes	stool NSCLC	2	17	0.00447007	0.448602
22	ASV_73	217.921	5.67713	1.20415	4.71464	2.42133e-06	0.000156694	ASV	COPD_no vs COPD_yes	stool NSCLC	3	27	0.0100714	0.483673
23	ASV_84	38.3407	21.1534	2.31496	9.13769	6.37994e-20	7.22528e-18	ASV	COPD_no vs COPD_yes	stool NSCLC	1	12	0.00247597	0.287242
24	Family_Christensenellaceae	1823.16	1.53111	0.465515	3.28907	0.0010052	0.0236221	Family	COPD_no vs COPD_yes	stool NSCLC	15	40	1.5948	3.93191
25	Family_Enterococcaceae	90.2124	4.26404	1.2204	3.49398	0.000475871	0.0223659	Family	COPD_no vs COPD_yes	stool NSCLC	6	22	0.188153	0.449098
26	Genus_Bacteroides	5223.48	1.71383	0.457742	3.7441	0.000181044	0.0196605	Genus	COPD_no vs COPD_yes	stool NSCLC	15	40	5.43994	11.5533
27	Genus_Enterococcus	166.573	4.81189	1.3325	3.61117	0.000304814	0.0196605	Genus	COPD_no vs COPD_yes	stool NSCLC	6	22	0.204042	0.468733
28	Order_Christensenellales	2034.25	1.66765	0.479914	3.47488	0.000511079	0.00689957	Order	COPD_no vs COPD_yes	stool NSCLC	15	40	1.57585	3.87392
29	Order_Clostridia vadinBB60 group	87.8942	3.39036	0.885063	3.83064	0.00012781	0.00345086	Order	COPD_no vs COPD_yes	stool NSCLC	9	32	0.016696	0.171596
30	Phylum_Proteobacteria	3196.99	1.75886	0.515538	3.4117	0.000645589	0.00451912	Phylum	COPD_no vs COPD_yes	stool NSCLC	15	40	4.84877	7.56989
31	Species_Prevotella stercorea	117.516	10.3897	1.96186	5.29587	1.18451e-07	9.71295e-06	Species	COPD_no vs COPD_yes	stool NSCLC	1	12	0.13838	1.07175
32	ASV_105	14.5233	6.24367	1.95371	3.19581	0.0013944	0.0271907	ASV	COPD_no vs COPD_yes	biopsy parenchyma	0	16	0	0.316359
33	ASV_142	16.6049	19.2085	2.49699	7.69267	1.44101e-14	5.61995e-13	ASV	COPD_no vs COPD_yes	biopsy parenchyma	1	11	0.175353	0.283044
34	ASV_68	17.6846	21.8467	2.52943	8.63702	5.76994e-18	4.50055e-16	ASV	COPD_no vs COPD_yes	biopsy parenchyma	1	11	0.0369818	0.248315
35	ASV_82	28.7017	7.22453	2.18433	3.30743	0.000941566	0.0244807	ASV	COPD_no vs COPD_yes	biopsy parenchyma	1	14	0.0347001	0.117177
36	Phylum_Patescibacteria	7.54096	4.75389	1.55155	3.06396	0.00218425	0.017474	Phylum	COPD_no vs COPD_yes	biopsy parenchyma	1	19	0.00148467	0.115097
