# Supplementary material for: Detailed Characterization of the Lung–Gut Microbiome Axis Reveals the Link between PD-L1 and the Microbiome in Non-Small-Cell Lung Cancer Patients
Source: Int J Mol Sci. 2024 Feb 15;25(4):2323. doi: 10.3390/ijms25042323 (PMC10889071; doi:10.3390/ijms25042323)
Supplement: Supplementary file 1 [file ijms-25-02323-s001.zip › Supplementary Table S7.xlsx]

## Sheet: Histollogy
Number	baseMean	log2FoldChange	lfcSE	stat	pvalue	padj	Phylum	Class	Order	Family	Genus	Species	Tax level	Variable	Group	Comp	Mean in Adenocarcinoma group	Mean in Squamous cell carcinoma group	Count in Adenocarcinoma group	Count in Squamous cell carcinoma group
1	170.459	6.38569	1.51545	4.21372	2.51197e-05	0.00298924	Proteobacteria	Gammaproteobacteria	Burkholderiales	Neisseriaceae	Neisseria	Neisseria subflava	Species	Species Neisseria subflava	biopsy cancer	Squamous cell carcinoma vs Adenocarcinoma	1.20456	3.16703	7	14
2	24.736	-25.1897	2.9487	-8.54265	1.31177e-17	5.7718e-16	Actinobacteriota	Actinobacteria	Micrococcales	Cellulomonadaceae			Family	Family Cellulomonadaceae	biopsy parenchyma	Squamous cell carcinoma vs Adenocarcinoma	1.9996	0.00433915	6	1
3	25.2653	-24.8491	2.94869	-8.42714	3.54207e-17	2.19609e-15	Actinobacteriota	Actinobacteria	Micrococcales	Cellulomonadaceae	Tropheryma		Genus	Genus Tropheryma	biopsy parenchyma	Squamous cell carcinoma vs Adenocarcinoma	2.0085	0	6	0
4	19.6592	-25.1491	2.94912	-8.52765	1.49352e-17	1.17988e-15	Actinobacteriota	Actinobacteria	Micrococcales	Cellulomonadaceae	Tropheryma	Tropheryma whipplei	Species	Species Tropheryma whipplei	biopsy parenchyma	Squamous cell carcinoma vs Adenocarcinoma	6.64076	0	6	0
5	14.4312	-4.38378	1.6647	-2.63338	0.00845386	0.0394513	Proteobacteria	Alphaproteobacteria					Class	Class Alphaproteobacteria	stool cancer	Squamous cell carcinoma vs Adenocarcinoma	0.0819702	0.0112338	16	5
6	2890.25	0.907456	0.335521	2.70462	0.00683831	0.0394513	Actinobacteriota	Coriobacteriia					Class	Class Coriobacteriia	stool cancer	Squamous cell carcinoma vs Adenocarcinoma	5.49219	7.82808	32	23
7	606.128	-2.14746	0.677981	-3.16744	0.00153788	0.0215304	Firmicutes	Negativicutes					Class	Class Negativicutes	stool cancer	Squamous cell carcinoma vs Adenocarcinoma	2.53487	1.37264	32	23
8	1630.18	-1.64235	0.525906	-3.12289	0.00179085	0.0393986	Bacteroidota	Bacteroidia	Bacteroidales	Rikenellaceae			Family	Family Rikenellaceae	stool cancer	Squamous cell carcinoma vs Adenocarcinoma	5.29822	2.56613	32	23
9	456.362	-3.19838	0.963894	-3.31819	0.000906037	0.0393986	Firmicutes	Negativicutes	Veillonellales-Selenomonadales	Veillonellaceae			Family	Family Veillonellaceae	stool cancer	Squamous cell carcinoma vs Adenocarcinoma	1.6909	0.912858	29	19
10	1002.47	-5.27059	1.48588	-3.54711	0.000389478	0.0132422	Firmicutes	Negativicutes	Veillonellales-Selenomonadales	Veillonellaceae	Dialister		Genus	Genus Dialister	stool cancer	Squamous cell carcinoma vs Adenocarcinoma	1.38418	0.800283	23	11
11	10.503	-5.59884	1.45095	-3.85874	0.000113975	0.00775031	Proteobacteria	Gammaproteobacteria	Enterobacterales	Pasteurellaceae	Haemophilus		Genus	Genus Haemophilus	stool cancer	Squamous cell carcinoma vs Adenocarcinoma	0.140141	0.00913316	16	5
12	43.2895	-25.2752	2.473	-10.2204	1.60613e-24	2.18434e-22	Firmicutes	Bacilli	Lactobacillales	Lactobacillaceae	Ligilactobacillus		Genus	Genus Ligilactobacillus	stool cancer	Squamous cell carcinoma vs Adenocarcinoma	0.279791	0.00217637	12	2
13	18.3836	-7.18398	1.97766	-3.63257	0.000280611	0.012721	Firmicutes	Negativicutes	Veillonellales-Selenomonadales	Veillonellaceae	Megasphaera		Genus	Genus Megasphaera	stool cancer	Squamous cell carcinoma vs Adenocarcinoma	0.23642	0.135426	13	7
14	26.5117	-5.74703	1.69679	-3.38701	0.000706584	0.0192191	Firmicutes	Negativicutes	Veillonellales-Selenomonadales	Veillonellaceae	Veillonella		Genus	Genus Veillonella	stool cancer	Squamous cell carcinoma vs Adenocarcinoma	0.18431	0.0218055	15	7
15	3.7325	22.2824	2.94882	7.55636	4.14517e-14	1.16065e-12	Proteobacteria	Gammaproteobacteria	Pseudomonadales				Order	Order Pseudomonadales	stool cancer	Squamous cell carcinoma vs Adenocarcinoma	0.0152668	0.0437789	3	8
16	422.053	-2.97536	0.965945	-3.08026	0.00206819	0.0289547	Firmicutes	Negativicutes	Veillonellales-Selenomonadales				Order	Order Veillonellales-Selenomonadales	stool cancer	Squamous cell carcinoma vs Adenocarcinoma	1.79414	0.914249	30	19
17	11.4622	-24.0487	2.52582	-9.52113	1.71303e-21	1.83294e-19	Firmicutes	Clostridia	Lachnospirales	Lachnospiraceae	Butyrivibrio	Butyrivibrio crossotus	Species	Species Butyrivibrio crossotus	stool cancer	Squamous cell carcinoma vs Adenocarcinoma	0.937317	0.25862	7	1
