# Supplementary material for: Detailed Characterization of the Lung–Gut Microbiome Axis Reveals the Link between PD-L1 and the Microbiome in Non-Small-Cell Lung Cancer Patients
Source: Int J Mol Sci. 2024 Feb 15;25(4):2323. doi: 10.3390/ijms25042323 (PMC10889071; doi:10.3390/ijms25042323)
Supplement: Supplementary file 1 [file ijms-25-02323-s001.zip › Supplementary Table S8.xlsx]

## Sheet: degree of differentiation
Number	baseMean	log2FoldChange	lfcSE	stat	pvalue	padj	Phylum	Class	Order	Family	Genus	Species	Tax_level	Variable	Group	Comp	Mean in G2 group	Mean in G2/3 group	Count in G2 group	Count in G2/3 group
1	3409.67	-1.07259	0.371696	-2.88566	0.00390597	0.0312478	Actinobacteriota						Phylum	Phylum Actinobacteriota	stool cancer	G2/3 vs G2	8.7464	4.64276	28	25
2	3013.15	-1.15596	0.319536	-3.61762	0.000297329	0.00386528	Actinobacteriota	Coriobacteriia					Class	Class Coriobacteriia	stool cancer	G2/3 vs G2	8.55476	4.52117	28	25
3	5.39284	-23.6202	2.67635	-8.82554	1.08931e-18	1.47057e-16	Firmicutes	Clostridia	Lachnospirales	Lachnospiraceae	[Ruminococcus] gnavus group		Genus	Genus [Ruminococcus] gnavus group	stool cancer	G2/3 vs G2	0.185083	0.00465568	8	1
