# Supplementary material for: Detailed Characterization of the Lung–Gut Microbiome Axis Reveals the Link between PD-L1 and the Microbiome in Non-Small-Cell Lung Cancer Patients
Source: Int J Mol Sci. 2024 Feb 15;25(4):2323. doi: 10.3390/ijms25042323 (PMC10889071; doi:10.3390/ijms25042323)
Supplement: Supplementary file 1 [file ijms-25-02323-s001.zip › Supplementary Table S9.xlsx]

## Sheet: PD_L1_NSCLC
number	baseMean	log2FoldChange	lfcSE	stat	pvalue	padj	Phylum	Class	Order	Family	Genus	Species	Tax_level	Variable	Comp	Group	Mean in group 1 (<1 %)	Mean in group 2 (1-50 %)	Mean in group 3 (> 50%)	Count in group 1 (<1 %)	Count in group 2 (1-50 %)	Count in group 3 (> 50%)
1	59.9515	-23.765	2.53727	-9.36636	7.50797e-21	3.60383e-19	Actinobacteriota	Actinobacteria	Actinomycetales	Actinomycetaceae	Actinomyces	Actinomyces graevenitzii	Species	Species Actinomyces graevenitzii	<=1 vs 1-50	biopsy parenchyma	1.9361	4.19982	1.03862	11	7	7
2	73.164	7.50532	2.09402	3.58416	0.000338159	0.00845396	Actinobacteriota	Actinobacteria	Actinomycetales	Actinomycetaceae	Actinomyces	Actinomyces graevenitzii	Species	Species Actinomyces graevenitzii	1-50 vs >=50	biopsy parenchyma	1.9361	4.19982	1.03862	11	7	7
3	67.4056	26.9279	3.02531	8.90087	5.54111e-19	2.43809e-17	Bacteroidota	Bacteroidia	Bacteroidales	Porphyromonadaceae	Porphyromonas	Porphyromonas gingivalis	Species	Species Porphyromonas gingivalis	<=1 vs >=50	biopsy parenchyma	5.84971	0.909988	0.0404931	1	2	2
4	49.4422	9.61658	2.38937	4.02474	5.70395e-05	0.00125487	Bacteroidota	Bacteroidia	Bacteroidales	Prevotellaceae	Prevotella	Prevotella nanceiensis	Species	Species Prevotella nanceiensis	<=1 vs >=50	biopsy parenchyma	0.64166	1.08754	0.0589976	8	4	2
5	3.58785	-22.3444	2.94246	-7.59379	3.10692e-14	1.55346e-12	Firmicutes	Bacilli	Lactobacillales	Streptococcaceae	Streptococcus	Streptococcus mitis	Species	Species Streptococcus mitis	1-50 vs >=50	biopsy parenchyma	4.36647	0.205954	2.51673	3	1	6
6	109.071	4.42258	0.986924	4.48117	7.42341e-06	0.00032663	Proteobacteria	Gammaproteobacteria	Burkholderiales	Neisseriaceae			Family	Family Neisseriaceae	1-50 vs >=50	biopsy cancer	0.841847	3.07862	1.41478	15	11	12
7	94.5264	4.13265	1.05828	3.90505	9.42061e-05	0.00593499	Proteobacteria	Gammaproteobacteria	Burkholderiales	Neisseriaceae	Neisseria		Genus	Genus Neisseria	1-50 vs >=50	biopsy cancer	0.862049	3.20625	1.43338	15	10	11
8	342.071	2.92027	0.888271	3.28759	0.00101047	0.0242514	Actinobacteriota	Actinobacteria	Actinomycetales				Order	Order Actinomycetales	<=1 vs >=50	biopsy cancer	3.92467	4.19435	2.14379	18	16	17
9	264.25	2.53356	0.895765	2.82838	0.00467846	0.0421061	Actinobacteriota	Actinobacteria	Actinomycetales				Order	Order Actinomycetales	1-50 vs >=50	biopsy cancer	3.92467	4.19435	2.14379	18	16	17
10	111.184	4.19147	0.903331	4.64002	3.48382e-06	9.40631e-05	Proteobacteria	Gammaproteobacteria	Burkholderiales				Order	Order Burkholderiales	1-50 vs >=50	biopsy cancer	1.02552	3.18539	1.71349	17	14	17
11	4.28309	5.01849	1.7279	2.90438	0.0036798	0.0421061	Bacteroidota	Bacteroidia	Flavobacteriales				Order	Order Flavobacteriales	1-50 vs >=50	biopsy cancer	0.471851	0.639946	0.232771	15	13	13
12	6.27661	24.5274	2.92805	8.37669	5.44375e-17	3.484e-15	Firmicutes	Bacilli	Lactobacillales	Streptococcaceae	Streptococcus	Streptococcus infantis	Species	Species Streptococcus infantis	1-50 vs >=50	biopsy cancer	1.12606	0.882893	1.07145	9	8	4
13	41.2776	-8.45469	2.01938	-4.18677	2.82947e-05	0.00116008	Bacteroidota	Bacteroidia	Bacteroidales	Muribaculaceae			Family	Family Muribaculaceae	<=1 vs >=50	stool cancer	0.20129	1.06701	2.29524	8	6	6
14	3.88321	21.9243	2.94216	7.45176	9.21023e-14	3.8683e-12	Proteobacteria	Gammaproteobacteria	Pseudomonadales	Pseudomonadaceae			Family	Family Pseudomonadaceae	<=1 vs 1-50	stool cancer	0.0649265	0.0407741	0.00189616	3	2	1
15	1256.24	2.69577	0.859351	3.13698	0.00170699	0.0358467	Firmicutes	Bacilli	Lactobacillales	Streptococcaceae			Family	Family Streptococcaceae	<=1 vs 1-50	stool cancer	4.4837	1.26868	1.13055	14	13	13
16	16.0356	24.1039	2.93915	8.20099	2.38413e-16	2.98017e-14	Firmicutes	Bacilli	Erysipelotrichales	Erysipelotrichaceae	Catenisphaera		Genus	Genus Catenisphaera	<=1 vs 1-50	stool cancer	0.399895	0.319814	0.134397	1	2	5
17	23.586	5.60191	1.80961	3.09564	0.00196389	0.0490974	Actinobacteriota	Coriobacteriia	Coriobacteriales	Eggerthellaceae	Eggerthella		Genus	Genus Eggerthella	<=1 vs 1-50	stool cancer	0.272642	0.24992	0.0612447	3	7	4
18	11.1506	-22.5567	2.81021	-8.02669	1.00137e-15	1.18161e-13	Firmicutes	Bacilli	Erysipelotrichales	Erysipelotrichaceae	Erysipelotrichaceae UCG-006		Genus	Genus Erysipelotrichaceae UCG-006	<=1 vs >=50	stool cancer	0.00353155	0.0161622	0.0649552	2	2	4
19	90.7393	-10.0746	1.73507	-5.80647	6.38041e-09	2.6585e-07	Actinobacteriota	Coriobacteriia	Coriobacteriales	Atopobiaceae	Olsenella		Genus	Genus Olsenella	<=1 vs 1-50	stool cancer	0.0396458	0.271235	0.0866678	9	4	8
21	17.9405	-22.1106	2.52174	-8.768	1.81861e-18	2.25507e-16	Proteobacteria	Gammaproteobacteria	Burkholderiales	Sutterellaceae	Parasutterella		Genus	Genus Parasutterella	1-50 vs >=50	stool cancer	0.00958932	0.0149923	0.136778	2	3	8
22	9.91167	22.9796	2.94212	7.81058	5.69271e-15	3.3587e-13	Proteobacteria	Gammaproteobacteria	Pseudomonadales	Pseudomonadaceae	Pseudomonas		Genus	Genus Pseudomonas	<=1 vs >=50	stool cancer	0.0760915	0.0453375	0.00218019	3	2	1
23	14.337	-22.8259	2.94322	-7.7554	8.80635e-15	5.50397e-13	Bacteroidota	Bacteroidia	Bacteroidales	Rikenellaceae	Rikenellaceae RC9 gut group		Genus	Genus Rikenellaceae RC9 gut group	<=1 vs 1-50	stool cancer	0.248299	2.61949	2.93187	7	8	8
24	18.6715	5.65962	1.76234	3.21142	0.0013208	0.0389637	Firmicutes	Clostridia	Lachnospirales	Lachnospiraceae	Sellimonas		Genus	Genus Sellimonas	<=1 vs >=50	stool cancer	0.307909	0.325948	0.0859277	3	8	3
25	971.154	3.12861	0.933034	3.35316	0.000798945	0.024967	Firmicutes	Bacilli	Lactobacillales	Streptococcaceae	Streptococcus		Genus	Genus Streptococcus	<=1 vs 1-50	stool cancer	4.68657	1.35856	1.1084	14	13	11
26	1267.83	2.37248	0.713633	3.32451	0.000885731	0.0119574	Firmicutes	Bacilli	Lactobacillales				Order	Order Lactobacillales	<=1 vs >=50	stool cancer	5.8396	1.50919	1.5077	14	13	13
27	4.84173	22.2304	2.94124	7.55815	4.08833e-14	1.06297e-12	Proteobacteria	Gammaproteobacteria	Pseudomonadales				Order	Order Pseudomonadales	<=1 vs 1-50	stool cancer	0.063665	0.0401555	0.00188216	3	3	1
28	5.76437	22.3695	2.94306	7.60078	2.9436e-14	7.94771e-13	Proteobacteria	Gammaproteobacteria	Pseudomonadales				Order	Order Pseudomonadales	<=1 vs >=50	stool cancer	0.063665	0.0401555	0.00188216	3	3	1
29	150.955	-24.4218	2.62008	-9.32102	1.15227e-20	1.03704e-18	Proteobacteria	Gammaproteobacteria	Enterobacterales	Enterobacteriaceae	Klebsiella	Klebsiella pneumoniae	Species	Species Klebsiella pneumoniae	<=1 vs >=50	stool cancer	0	0.683076	6.43966	1	0	4
30	150.955	-24.4218	2.62008	-9.32102	1.15227e-20	1.03704e-18	Proteobacteria	Gammaproteobacteria	Enterobacterales	Enterobacteriaceae	Klebsiella	Klebsiella pneumoniae	Species	Species Klebsiella pneumoniae	1-50 vs >=50	stool cancer	0	0.683076	6.43966	1	0	4
