# Supplementary material for: Detailed Characterization of the Lung–Gut Microbiome Axis Reveals the Link between PD-L1 and the Microbiome in Non-Small-Cell Lung Cancer Patients
Source: Int J Mol Sci. 2024 Feb 15;25(4):2323. doi: 10.3390/ijms25042323 (PMC10889071; doi:10.3390/ijms25042323)
Supplement: Supplementary file 1 [file ijms-25-02323-s001.zip › Supplementary Table S10.xlsx]

## Sheet: CD8_NSCLC
number	Row.names	baseMean	log2FoldChange	lfcSE	stat	pvalue	padj	Tax	Comp	Group	count_CD8_less_median	count_CD8_more_median	mean_CD8_less_median	mean_CD8_more_median
1	ASV_14	45.7017	-5.20234	1.6207	-3.20994	0.00132763	0.0398289	ASV	CD8>median vs CD8<median	biopsy tumor	12	7	1.36175	0.350533
2	ASV_379	9.61043	6.45522	1.75385	3.68059	0.000232693	0.0139616	ASV	CD8>median vs CD8<median	biopsy tumor	0	10	0	0.141476
3	Class_Clostridia	454.872	0.787531	0.250852	3.13942	0.00169283	0.020314	Class	CD8>median vs CD8<median	biopsy tumor	37	37	5.97974	6.86186
4	Order_Burkholderiales	182.956	-1.85899	0.5806	-3.20185	0.0013655	0.019117	Order	CD8>median vs CD8<median	biopsy tumor	32	32	2.43906	1.17418
5	Order_Christensenellales	7.7973	2.24493	0.806334	2.78411	0.00536744	0.0375721	Order	CD8>median vs CD8<median	biopsy tumor	16	20	0.0420973	0.152408
6	Order_Lachnospirales	277.828	0.802625	0.285601	2.8103	0.00494955	0.0375721	Order	CD8>median vs CD8<median	biopsy tumor	37	37	4.21997	4.55614
7	Order_Staphylococcales	117.18	-1.49026	0.377442	-3.94832	7.87027e-05	0.00220367	Order	CD8>median vs CD8<median	biopsy tumor	36	34	3.94972	0.885846
8	ASV_1160	7.75779	6.39002	2.00635	3.18489	0.00144808	0.0424856	ASV	CD8>median vs CD8<median	biopsy parenchyma	1	7	0.00358105	0.0525735
9	ASV_241	15.4763	23.9637	1.9384	12.3626	4.16415e-35	2.83162e-33	ASV	CD8>median vs CD8<median	biopsy parenchyma	1	8	0.0219424	0.136539
10	ASV_254	28.828	-6.48349	2.08509	-3.10945	0.00187436	0.0424856	ASV	CD8>median vs CD8<median	biopsy parenchyma	7	2	0.270219	0.0153986
11	Class_Gracilibacteria	5.31401	5.55426	1.74212	3.18823	0.00143147	0.0200406	Class	CD8>median vs CD8<median	biopsy parenchyma	1	9	0.0609886	0.0865965
