# Supplementary material for: Detailed Characterization of the Lung–Gut Microbiome Axis Reveals the Link between PD-L1 and the Microbiome in Non-Small-Cell Lung Cancer Patients
Source: Int J Mol Sci. 2024 Feb 15;25(4):2323. doi: 10.3390/ijms25042323 (PMC10889071; doi:10.3390/ijms25042323)
Supplement: Supplementary file 1 [file ijms-25-02323-s001.zip › Supplementary Table S11.xlsx]

## Sheet: LPS_NSCLC
number	Row.names	baseMean	log2FoldChange	lfcSE	stat	pvalue	padj	Tax	Comp	Group	count_LPS_less_median	count_LPS_more_median	mean_LPS_less_median	mean_LPS_more_median
1	ASV_15	121.281	1.67697	0.416159	4.02963	5.58643e-05	0.00441328	ASV	LPS>median vs LPS<median	biopsy parenchyma	23	23	1.44302	3.82674
2	Genus_Mesorhizobium	146.702	1.91766	0.476918	4.02094	5.79662e-05	0.0037678	Genus	LPS>median vs LPS<median	biopsy parenchyma	23	23	1.46788	3.90057
3	Order_Rhizobiales	156.214	1.51149	0.46882	3.22403	0.00126399	0.0391838	Order	LPS>median vs LPS<median	biopsy parenchyma	23	23	1.48052	3.84864
4	ASV_107	7.31423	-23.146	2.28167	-10.1443	3.51292e-24	1.41922e-21	ASV	LPS>median vs LPS<median	stool tumor	6	2	0.0973126	0.0455155
5	ASV_1080	13.4405	23.2308	2.33204	9.96157	2.24478e-23	4.53446e-21	ASV	LPS>median vs LPS<median	stool tumor	1	6	0.00275843	0.0966562
6	ASV_1358	8.14853	-23.2922	2.47245	-9.42071	4.48031e-21	6.03348e-19	ASV	LPS>median vs LPS<median	stool tumor	6	0	0.0848406	0
7	ASV_727	12.7229	7.12684	1.87365	3.80371	0.000142543	0.0143969	ASV	LPS>median vs LPS<median	stool tumor	0	8	0	0.0437544
8	Class_Gammaproteobacteria	3503.47	-2.1895	0.58019	-3.77377	0.000160797	0.00122539	Class	LPS>median vs LPS<median	stool tumor	21	21	9.66006	2.52725
9	Class_Vampirivibrionia	33.955	4.89917	1.31207	3.73392	0.000188521	0.00122539	Class	LPS>median vs LPS<median	stool tumor	5	12	0.0202693	0.118514
10	Family_Enterobacteriaceae	3498.56	-2.49469	0.718227	-3.4734	0.000513908	0.0198641	Family	LPS>median vs LPS<median	stool tumor	20	21	8.24059	1.96839
11	Family_Lactobacillaceae	123.097	3.37229	1.00865	3.34337	0.000827672	0.0198641	Family	LPS>median vs LPS<median	stool tumor	13	15	0.18063	0.413428
12	Genus_Hungatella	9.03141	-6.85134	1.85323	-3.69698	0.000218177	0.0268358	Genus	LPS>median vs LPS<median	stool tumor	8	1	0.0266445	0.00563984
13	Order_Enterobacterales	4782.43	-2.6674	0.719955	-3.70495	0.000211431	0.00592008	Order	LPS>median vs LPS<median	stool tumor	20	21	9.24649	2.27002
14	Phylum_Cyanobacteria	31.487	4.74736	1.4307	3.31821	0.000905949	0.0036238	Phylum	LPS>median vs LPS<median	stool tumor	5	12	0.0202612	0.118473
15	Phylum_Proteobacteria	3391.15	-2.1661	0.546752	-3.96175	7.44025e-05	0.00059522	Phylum	LPS>median vs LPS<median	stool tumor	21	21	9.70739	2.59125
