# Supplementary material for: Detailed Characterization of the Lung–Gut Microbiome Axis Reveals the Link between PD-L1 and the Microbiome in Non-Small-Cell Lung Cancer Patients
Source: Int J Mol Sci. 2024 Feb 15;25(4):2323. doi: 10.3390/ijms25042323 (PMC10889071; doi:10.3390/ijms25042323)
Supplement: Supplementary file 1 [file ijms-25-02323-s001.zip › Supplementary Table S12.xlsx]

## Sheet: Stage_NSCLC
number	baseMean	log2FoldChange	lfcSE	stat	pvalue	padj	Phylum	Class	Order	Family	Genus	Species	Tax_level	Variable	Comp	Group	Mean in Stage I-II group	Mean in Stage III group	Mean in Stage IV group	Count in Stage I-II group	Count in Stage III group	Count in Stage IV group
1	178.618	-2.43711	0.572507	-4.2569	2.07277e-05	0.00026946	Proteobacteria	Alphaproteobacteria					Class	Class Alphaproteobacteria	III vs IV	biopsy parenchyma	4.68279	0.461929	2.26487	13	12	29
2	129.436	-1.82358	0.516403	-3.53131	0.000413504	0.0111646	Proteobacteria	Alphaproteobacteria	Rhizobiales				Order	Order Rhizobiales	III vs IV	biopsy parenchyma	4.64741	0.438657	2.17905	13	12	29
3	49.105	-24.9795	2.69033	-9.28491	1.61838e-20	1.11668e-18	Actinobacteriota	Actinobacteria	Actinomycetales	Actinomycetaceae	Actinomyces	Actinomyces graevenitzii	Species	Species Actinomyces graevenitzii	I-II vs IV	biopsy parenchyma	1.49422	4.37682	1.9665	9	8	21
4	40.3672	-6.16757	1.72077	-3.58418	0.000338133	0.0209642	Proteobacteria	Gammaproteobacteria	Burkholderiales	Neisseriaceae	Neisseria	Neisseria subflava	Species	Species Neisseria subflava	III vs IV	biopsy parenchyma	3.15432	0.339653	1.964	5	2	14
5	240.278	-3.51333	0.972651	-3.61212	0.000303708	0.00880754	Proteobacteria	Gammaproteobacteria	Burkholderiales				Order	Order Burkholderiales	III vs IV	biopsy cancer	0.601357	1.35554	2.80173	17	19	28
6	184.243	-2.02961	0.639952	-3.17151	0.0015165	0.0219893	Actinobacteriota	Actinobacteria	Actinomycetales				Order	Order Actinomycetales	III vs IV	biopsy cancer	3.97703	2.45092	3.24009	16	20	32
7	1359.13	-1.56506	0.523106	-2.99186	0.00277281	0.0268039	Firmicutes	Bacilli	Lactobacillales				Order	Order Lactobacillales	III vs IV	biopsy cancer	18.504	12.0087	13.9371	19	22	33
8	252.636	-3.74981	1.06136	-3.533	0.000410868	0.015788	Proteobacteria	Gammaproteobacteria	Burkholderiales	Neisseriaceae			Family	Family Neisseriaceae	III vs IV	biopsy cancer	0.492982	1.22239	2.54401	13	15	22
9	205.017	-2.27298	0.665059	-3.4177	0.00063152	0.015788	Actinobacteriota	Actinobacteria	Actinomycetales	Actinomycetaceae			Family	Family Actinomycetaceae	III vs IV	biopsy cancer	4.01132	2.46533	3.26454	16	20	32
10	1827.62	2.43307	0.668351	3.6404	0.00027221	0.0101188	Firmicutes	Bacilli	Lactobacillales	Streptococcaceae	Streptococcus		Genus	Genus Streptococcus	I-II vs III	biopsy cancer	17.7195	11.3696	12.1652	19	21	32
11	413.259	3.64453	1.00542	3.62487	0.000289109	0.0101188	Actinobacteriota	Actinobacteria	Actinomycetales	Actinomycetaceae	Actinomyces		Genus	Genus Actinomyces	I-II vs III	biopsy cancer	4.11197	2.54527	3.3407	16	20	31
12	294.307	-4.10258	1.09464	-3.74789	0.000178328	0.0142663	Proteobacteria	Gammaproteobacteria	Burkholderiales	Neisseriaceae	Neisseria		Genus	Genus Neisseria	III vs IV	biopsy cancer	0.486707	1.21586	2.61846	12	13	21
13	18.9414	-22.1611	2.93115	-7.56056	4.01336e-14	1.96655e-12	Proteobacteria	Gammaproteobacteria	Enterobacterales	Succinivibrionaceae			Family	Family Succinivibrionaceae	I-II vs IV	stool cancer	0.0139544	0.203651	1.19734	3	3	5
14	9.59227	-22.197	3.01058	-7.373	1.6683e-13	1.17615e-11	Firmicutes	Clostridia	Lachnospirales	Lachnospiraceae	Butyrivibrio		Genus	Genus Butyrivibrio	III vs IV	stool cancer	0.0420149	0.00363874	0.412815	4	1	7
15	6.16352	-22.9701	2.95922	-7.76221	8.34639e-15	1.05999e-12	Firmicutes	Clostridia	Oscillospirales	Ruminococcaceae	CAG-352		Genus	Genus CAG-352	I-II vs III	stool cancer	0.0261288	0.123506	0.318584	1	5	5
16	1652.34	-2.92564	0.879206	-3.32759	0.00087601	0.0308794	Proteobacteria	Gammaproteobacteria	Enterobacterales	Enterobacteriaceae	Escherichia-Shigella		Genus	Genus Escherichia-Shigella	III vs IV	stool cancer	2.1042	1.52663	5.44979	17	13	19
17	369.29	-1.90765	0.600383	-3.17739	0.00148606	0.0419069	Firmicutes	Clostridia	Lachnospirales	Lachnospiraceae	Lachnospiraceae NK4A136 group		Genus	Genus Lachnospiraceae NK4A136 group	III vs IV	stool cancer	0.890665	0.681758	1.1772	18	14	22
18	19.9835	25.499	2.99173	8.52317	1.55247e-17	2.18898e-15	Firmicutes	Bacilli	Lactobacillales	Lactobacillaceae	Ligilactobacillus		Genus	Genus Ligilactobacillus	III vs IV	stool cancer	0.230384	0.26956	0.0387368	5	5	4
19	67.5705	9.19755	1.96247	4.68673	2.77608e-06	0.000176281	Bacteroidota	Bacteroidia	Bacteroidales	Prevotellaceae	Prevotella_7		Genus	Genus Prevotella 7	I-II vs III	stool cancer	0.800634	0.329902	0.692616	9	2	11
20	45.492	-10.4288	2.2222	-4.69299	2.69245e-06	0.000126545	Bacteroidota	Bacteroidia	Bacteroidales	Prevotellaceae	Prevotella_7		Genus	Genus Prevotella 7	III vs IV	stool cancer	0.800634	0.329902	0.692616	9	2	11
21	15.7561	-23.7341	2.93131	-8.09678	5.64353e-16	8.52173e-14	Proteobacteria	Gammaproteobacteria	Enterobacterales	Succinivibrionaceae	Succinivibrio		Genus	Genus Succinivibrio	I-II vs IV	stool cancer	0.00381665	0.195568	1.32079	1	3	4
22	3351.58	-2.05008	0.652483	-3.14197	0.00167817	0.0134254	Proteobacteria						Phylum	Phylum Proteobacteria	III vs IV	stool cancer	6.19275	3.25011	9.65288	19	14	22
23	18.6084	-24.5622	2.85115	-8.61483	7.00429e-18	3.78231e-16	Bacteroidota	Bacteroidia	Bacteroidales	Bacteroidaceae	Bacteroides	Bacteroides coprophilus	Species	Species Bacteroides coprophilus	I-II vs III	stool cancer	0	0.646683	0.0064401	0	4	1
24	3.77094	22.2158	2.9742	7.46948	8.05127e-14	2.17384e-12	Bacteroidota	Bacteroidia	Bacteroidales	Bacteroidaceae	Bacteroides	Bacteroides plebeius	Species	Species Bacteroides plebeius	I-II vs III	stool cancer	1.03449	0.0728863	0.413536	5	4	6
25	15.4141	24.0921	2.972	8.10634	5.21689e-16	1.87808e-14	Proteobacteria	Gammaproteobacteria	Enterobacterales	Enterobacteriaceae	Klebsiella	Klebsiella michiganensis	Species	Species Klebsiella michiganensis	I-II vs III	stool cancer	0.38023	0	0.157107	4	0	1
26	99.9992	26.6502	2.96994	8.97331	2.87724e-19	3.10742e-17	Proteobacteria	Gammaproteobacteria	Enterobacterales	Enterobacteriaceae	Klebsiella	Klebsiella pneumoniae	Species	Species Klebsiella pneumoniae	I-II vs III	stool cancer	1.83985	0.0476926	2.41478	4	1	1
27	29.5678	-25.4634	2.92591	8.70271	3.24043e-18	3.59688e-16	Proteobacteria	Gammaproteobacteria	Enterobacterales	Enterobacteriaceae	Klebsiella	Klebsiella pneumoniae	Species	Species Klebsiella pneumoniae	I-II vs IV	stool cancer	1.83985	0.0476926	2.41478	4	1	1
